# Supplementary material
Source: Springer Nature journal article supplement (https://springermedizin.de/resource/supplementary/12885_2008_1387_MOESM6_ESM.pdf/9472986)

**BV173 (Ph+)**

**SEM (Ph-)**

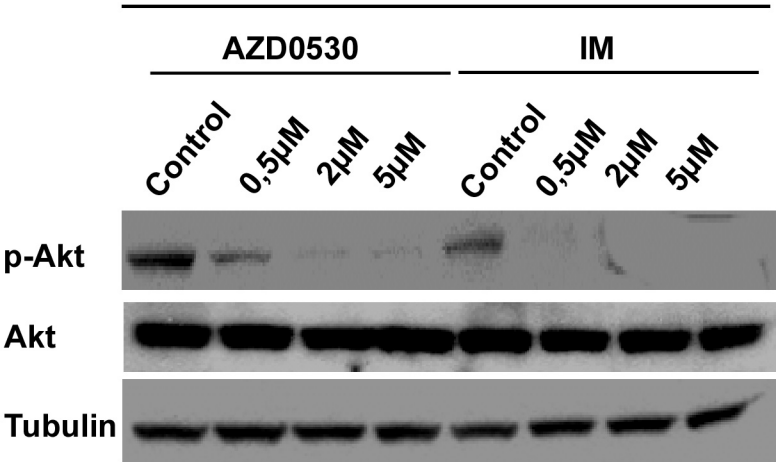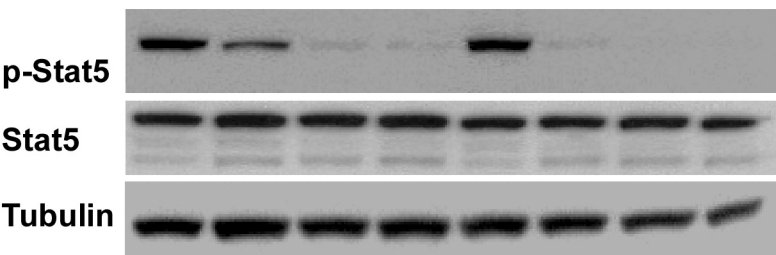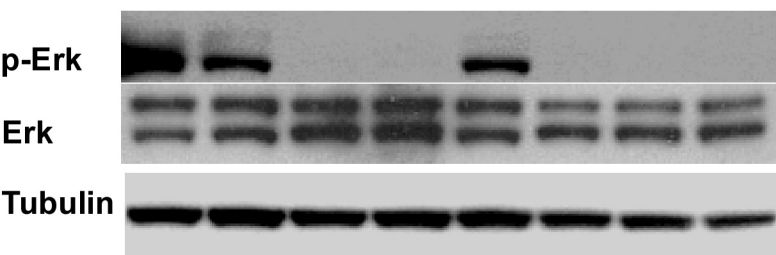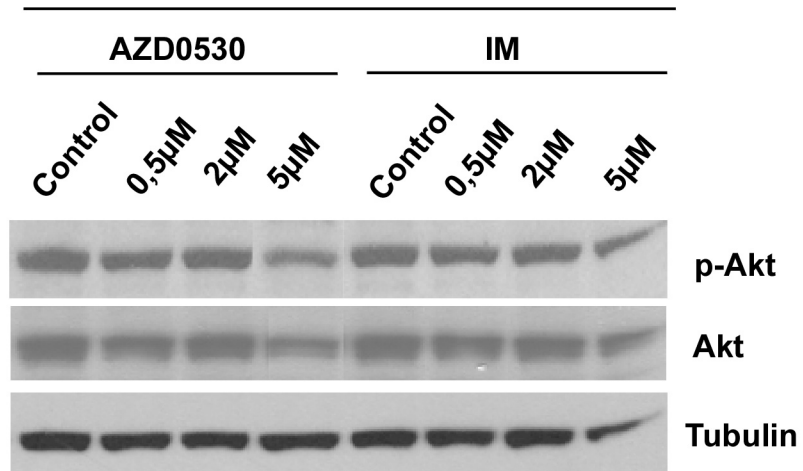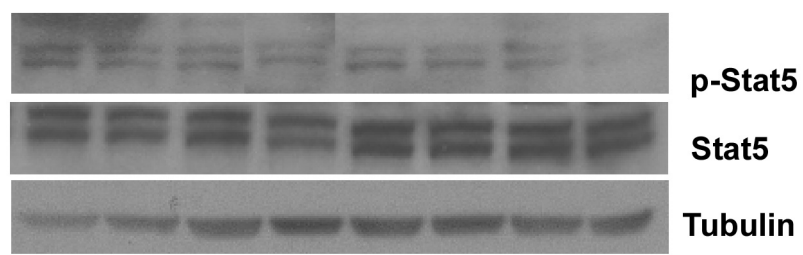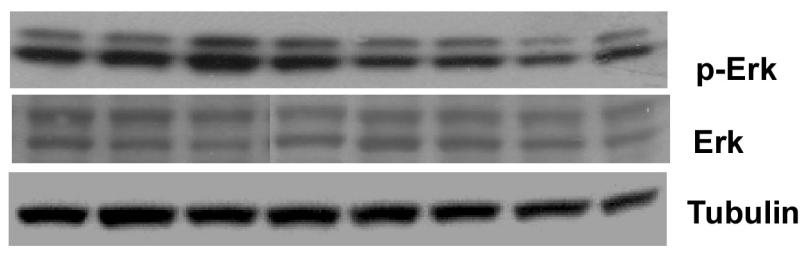

Supplement: MOESM6 [file 9472986]
